# Supplementary material for: A facile selenization of ZrO2 endowing it with catalytic activity for oxidative alkene degradation
Source: Royal Society of Chemistry journal article supplement (doi:10.1039/d4nj03725a), 2024-01-01
Supplement: d4nj03725a1.pdf [file d4nj03725a1.pdf]

**Supplementary Material for**

**A concise selenization of ZrO<sub>2</sub> endowing the material catalytic activity for oxidative alkene degradation†**

Daming Yong,<sup>a\*</sup> Tingting Zuo,<sup>b</sup> Rongrong Qian,<sup>c</sup> Zijie Wei,<sup>b</sup> Jie Tian,<sup>a</sup> Xu Zhang,<sup>b\*</sup>

<sup>a</sup> School of Chemical Engineering, Yangzhou Polytechnic Institute, Yangzhou, Jiangsu 225127, China

Email: [yongdaming@hit.edu.cn](mailto:yongdaming@hit.edu.cn). Tel: +86-514-87433323

<sup>b</sup> School of Chemistry and Chemical Engineering, Yangzhou University, Yangzhou, Jiangsu 225002, China

Email: [zhangxu@yzu.edu.cn](mailto:zhangxu@yzu.edu.cn). Tel: +86-514-87979061

<sup>c</sup> Jiangsu College of Tourism, Yangzhou 225009, China

**CONTENTS**

|                                            |    |
|--------------------------------------------|----|
| Original SEM image.....                    | S2 |
| Characterization data of benzophenone..... | S3 |

Original SEM image

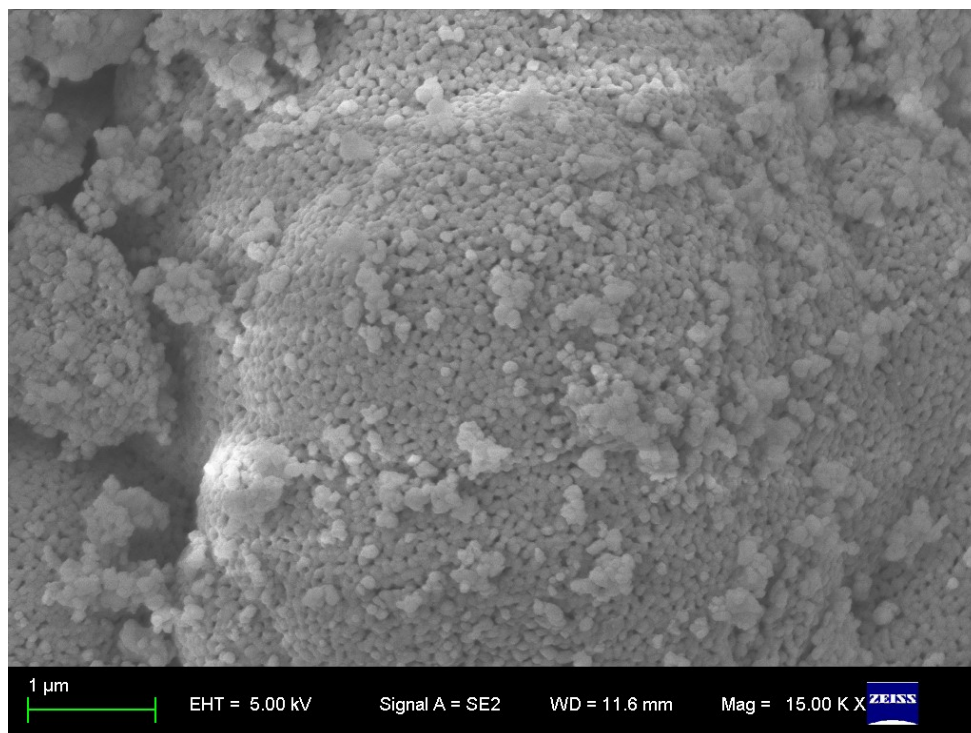

**Fig. S1.** SEM image of ZrO<sub>2</sub>.

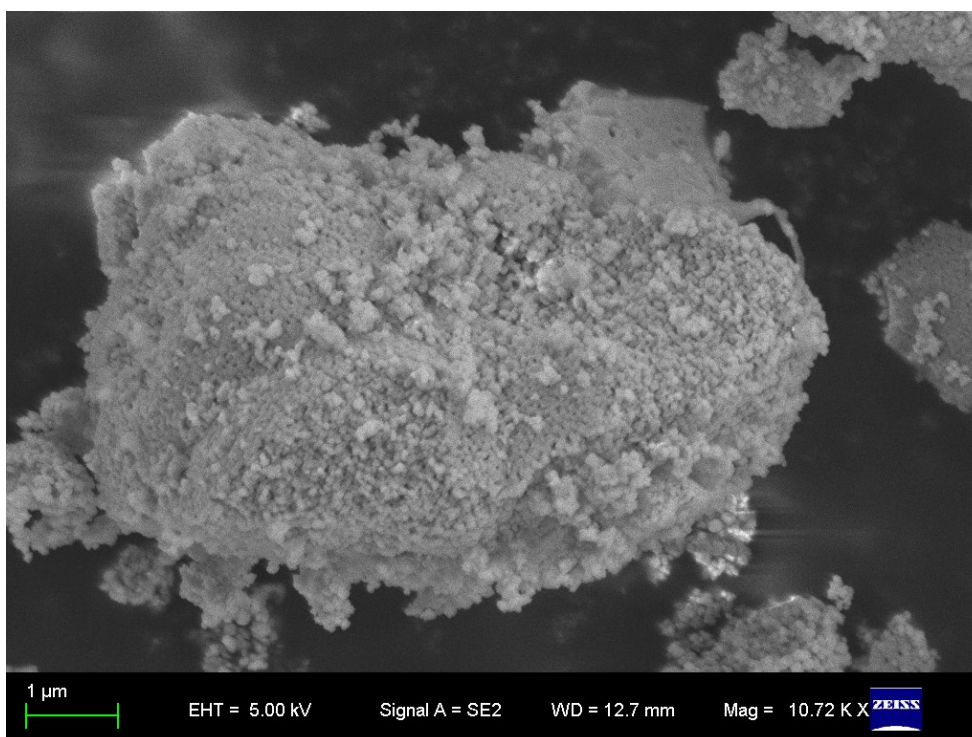

**Fig. S2.** SEM image of Se@ZrO<sub>2</sub>.

### Characterization data of benzophenone

**Benzophenone:** White solid, m.p. 47.8–49.0 °C (lit. 47–49 °C). IR (KBr): 3060, 1662, 1595, 1444, 1318, 1281, 1000, 931, 808, 765, 704, 631 cm<sup>-1</sup>; <sup>1</sup>H NMR (400 MHz, CDCl<sub>3</sub>, TMS, ppm): δ 7.80 (d, *J* = 6.4 Hz, 4H), 7.59 – 7.55 (m, 2H), 7.47 (t, *J* = 7.8 Hz, 4H); <sup>13</sup>C NMR (101 MHz, CDCl<sub>3</sub>, TMS, ppm): δ 196.8, 137.7, 132.5, 130.1, 128.3. *Known Compound*.<sup>1</sup>

### References

1. Spectral Database for Organic Compounds, SDBS:

[http://sdb.db.aist.go.jp/sdb/cgi-bin/direct\\_frame\\_top.cgi](http://sdb.db.aist.go.jp/sdb/cgi-bin/direct_frame_top.cgi).
